# Supplementary material
Source: publisher figshare collection journal article supplement (https://sage.figshare.com/ndownloader/files/14938547)
Supplement: Supplementary file 1 [file 14938547]

## Supplementary Appendix 2: Example of coding tree

| Quotation                                                                                                                                                                                                                                                                                                                                                                                                                       | Initial code                   | Focused code                          | Theoretical concept   |
|---------------------------------------------------------------------------------------------------------------------------------------------------------------------------------------------------------------------------------------------------------------------------------------------------------------------------------------------------------------------------------------------------------------------------------|--------------------------------|---------------------------------------|-----------------------|
| "We had newspaper articles on things that [the patient] had done so I put them all together in a folder. I took them in and I presented them to the head ICU doctor, and he had a flick through them, and he said to me "Oh well this paints a different picture then." Participant 19                                                                                                                                          | Dismissing assumptions         | Taking control of treatment decisions | Wrestling for control |
| And I've got the medical power of attorney and I'm in there. I'm going "Look, this is my medical power of attorney. I'm telling you take her off everything because I can't cope with this when she comes home." Participant 21                                                                                                                                                                                                 | Powers of attorney as leverage |                                       |                       |
| And anyway we got the nurse to have a look at it and she took a piece of hand towel from the wall, and she wiped the wound with this hand towel, and then stuck a normal piece of Band-Aid across this wound that had stuff coming out of it. [Yeah] And I thought, "It doesn't look right." So I waited until I saw the, the doc, and I got him to have a look. And he said, "Oh that's all right. No problem." Participant 20 | Requesting a second opinion    |                                       |                       |
| And I just sat in her ward and said "I'm not leaving here 'til there's a case conference and I'm involved". Participant 5                                                                                                                                                                                                                                                                                                       | Demanding a meeting            |                                       |                       |
| So I lost the plot and said "Take him off all the medication!" They're saying "You can't do that you cruel mother! You can't do that!" And I said "Yes I can!" Participant 18                                                                                                                                                                                                                                                   | Defying medical advice         |                                       |                       |
